# Supplementary material
Source: PubMed Central journal article supplement (PMC2244693)
Supplement: neo1002_0177SD1.pdf [file neo1002_0177SD1.pdf]

**Table W1.** Prostate Pathology in ARR2Pb-*ERG* Transgenic Mice.

| ARR2Pb- <i>ERG</i> Mouse | Founder No. | Age         | AP          | VP          | DLP            | Diagnosis    | Liver  |
|--------------------------|-------------|-------------|-------------|-------------|----------------|--------------|--------|
| 1                        | 272         | 12 weeks    | Normal      | Hyperplasia | Normal         | Hyperplasia  | NA     |
| 2                        | 272         | 12 weeks    | Normal      | Hyperplasia | Adipose tissue | Hyperplasia  | NA     |
| 3                        | 285         | 12 weeks    | Normal      | mPIN        | Normal         | mPIN         | NA     |
| 4                        | 285         | 12 weeks    | Normal      | mPIN        | Hyperplasia    | mPIN         | Normal |
| 5                        | 429         | 12–14 weeks | Hyperplasia | Hyperplasia | Hyperplasia    | Hyperplasia  | Normal |
| 6                        | 429         | 12–14 weeks | Normal      | No tissue   | Hyperplasia    | Hyperplasia  | Normal |
| 7                        | 429         | 12–14 weeks | No tissue   | mPIN        | Normal         | mPIN         | NA     |
| 8                        | 457         | 12–14 weeks | Normal      | Hyperplasia | Normal         | Hyperplasia  | Normal |
| 9                        | 285         | 20 weeks    | Normal      | Hyperplasia | Hyperplasia    | Hyperplasia  | Normal |
| 10                       | 282         | 34 weeks    | Hyperplasia | mPIN        | mPIN           | mPIN         | Normal |
| 11                       | 302         | 15 months   | Hyperplasia | Hyperplasia | Hyperplasia    | Hyperplasia  | Normal |
|                          |             | Total:      | 0/10 (0%)   | 4/10 (40%)  | 1/11 (9.1%)    | 4/11 (36.3%) |        |

For ARR2Pb-*ERG* transgenic mice, the founder number is indicated, along with the age of sacrifice. Observed pathology from H&E–stained sections from the anterior (AP), ventral (VP), and dorsolateral (DLP) prostatic lobes and an overall diagnosis of prostate pathology are given. The liver from the indicated mice was also dissected, and H&E–stained sections were observed for any pathology. NA, not available.

**Table W2.** Oligonucleotide Primers.

| Assay           | Gene/Region     | Sequence    | Bases     | Primer         | Sequence 5' to 3'              |
|-----------------|-----------------|-------------|-----------|----------------|--------------------------------|
| Expression qPCR | <i>ERG</i>      | NM_004449.3 | 574–597   | ERG_exon 5–6_f | CGCAGAGTTATCGTGCCAGCAGAT       |
| Expression qPCR | <i>ERG</i>      | NM_004449.3 | 659–636   | ERG_exon 5–6_r | CCATATTCTTTCACCGCCACTCC        |
| Expression qPCR | <i>SERPINE1</i> | NM_000602.1 | 1181–1200 | SERPINE1-f     | GCATGGCCCCGAGGAGAT             |
| Expression qPCR | <i>SERPINE1</i> | NM_000602.1 | 1270–1248 | SERPINE1-r     | CTTGGCCCATGAAAAGGACTGTT        |
| Expression qPCR | <i>IGFBP3</i>   | NM_000598.4 | 738–762   | IGFBP3-f       | CGAGTCCAAGCGGGAGACAGAATA       |
| Expression qPCR | <i>IGFBP3</i>   | NM_000598.4 | 837–814   | IGFBP3-r       | TACACCCCTGGGACTCAGCACATT       |
| Expression qPCR | <i>MMP3</i>     | NM_002422.3 | 1055–1080 | MMP3-f         | TTTATTTTGGCCATCTCTTCCTTCAG     |
| Expression qPCR | <i>MMP3</i>     | NM_002422.3 | 1181–1155 | MMP3-r         | TATCCAGCTCGTACTCATTTCCTCT      |
| Expression qPCR | <i>ADAM19</i>   | NM_023038.3 | 2146–2165 | ADAM19-f       | GCCTATGCCCCCTGAGAGTG           |
| Expression qPCR | <i>ADAM19</i>   | NM_023038.3 | 2271–2245 | ADAM19-r       | GCTTGAGTTGGCTAGTTTGTGTTC       |
| Expression qPCR | <i>MMP9</i>     | NM_004994.2 | 1181–1201 | MMP9-f         | TGCCCGGACCAAGGATACAGT          |
| Expression qPCR | <i>MMP9</i>     | NM_004994.2 | 1239–1221 | MMP9-r         | AGCGCTGGCCGAATCAT              |
| Expression qPCR | <i>PLAU</i>     | NM_002658.2 | 1169–1194 | PLAU-f         | TACGGCTCTGAAGTCAACACAAAAT      |
| Expression qPCR | <i>PLAU</i>     | NM_002658.2 | 1308–1286 | PLAU-r         | CCCCAGCTCACAAATCCAGTCAA        |
| Expression qPCR | <i>ARHGD1B</i>  | NM_001175.4 | 250–273   | ARHGD1B-f      | AGAAAACGCTGCTGGAGATGGT         |
| Expression qPCR | <i>ARHGD1B</i>  | NM_001175.4 | 326–307   | ARHGD1B-r      | CAGGGTGAGCCGGGTGACAA           |
| Expression qPCR | <i>KCNS3</i>    | NM_002252.3 | 1576–1599 | KCNS3-f        | CCCTTCCCATCACCATCATCTTCA       |
| Expression qPCR | <i>KCNS3</i>    | NM_002252.3 | 1659–1635 | KCNS3-r        | CCTCACTGCCTGGTCCACATCAAT       |
| Expression qPCR | <i>LAMC2</i>    | NM_005562.1 | 3317–3345 | LAMC2-f        | GGTGATTACAGAAGCCAGAAAGTTGATA   |
| Expression qPCR | <i>LAMC2</i>    | NM_005562.1 | 3408–3385 | LAMC2-r        | GCAGGAGCCGCTCAATGTTGA          |
| Expression qPCR | <i>F5</i>       | NM_000130.4 | 6560–6583 | F5-f           | CAGGGCTGCAAGTCTCTGTCTCT        |
| Expression qPCR | <i>F5</i>       | NM_000130.4 | 6641–6617 | F5-r           | GTTTCCATTCCACTCCCTGCTCACT      |
| Expression qPCR | <i>CACNA1D</i>  | NM_000720.1 | 5776–5805 | CACNA1D-f      | CTACTACAGCAGATACCCAGGCAGAAACAT |
| Expression qPCR | <i>CACNA1D</i>  | NM_000720.1 | 5885–5861 | CACNA1D-r      | GTGAATCATAGCAAACGGCGAGTC       |
| Expression qPCR | <i>CD44</i>     | NM_000610.3 | 3702–3727 | CD44-f         | TGTTATCCCTGGGGCCCTATTTCAT      |
| Expression qPCR | <i>CD44</i>     | NM_000610.3 | 3820–3791 | CD44-r         | ATCTCTTTCATTTCCATTTGGCTTCTCTCT |
| Expression qPCR | <i>PLAU</i>     | NM_002658.2 | 1169–1194 | PLAU-f         | TACGGCTCTGAAGTCAACACAAAAT      |
| Expression qPCR | <i>PLAU</i>     | NM_002658.2 | 1308–1286 | PLAU-r         | CCCCAGCTCACAAATCCAGTCAA        |
| Expression qPCR | <i>PLA1A</i>    | NM_015900.1 | 1194–1216 | PLA1A-f        | CCACCCACAAATGCCAGATAAAC        |
| Expression qPCR | <i>PLA1A</i>    | NM_015900.1 | 1283–1258 | PLA1A-r        | TCCAATAATGGTAGTCCGGTCTTTT      |
| Expression qPCR | <i>PLAT</i>     | NM_033011.1 | 843–863   | PLAT-f         | CACTGGGCTGGGCAACATA            |
| Expression qPCR | <i>PLAT</i>     | NM_033011.1 | 933–913   | PLAT-r         | CACGTAGCCCTGCGGTTCTTC          |
| Expression qPCR | <i>KLK3</i>     | NM_001648.2 | 826–849   | KLK3-f         | GAGCACCCCTATCAACCCCTATT        |
| Expression qPCR | <i>KLK3</i>     | NM_001648.2 | 944–921   | KLK3-r         | AGCAACCCTGGACCTCACACCTAA       |
| Expression qPCR | <i>SLC30A4</i>  | NM_013309.4 | 1608–1637 | SLC30A4-f      | TGTATTTTGGGAACCTCCTGCCTTATTATC |
| Expression qPCR | <i>SLC30A4</i>  | NM_013309.4 | 1696–1668 | SLC30A4-r      | CAGGATTCATTTTCTCATTTAGGTTTG    |
| Expression qPCR | <i>SLC45A3</i>  | NM_033102.2 | 1223–1242 | SLC45A3-f      | TCGTGGGCGAGGGGCTGTA            |
| Expression qPCR | <i>SLC45A3</i>  | NM_033102.2 | 1308–1284 | SLC45A3-r      | CATCCGAACGCTTCATCATAGTGT       |
| Expression qPCR | <i>TMPRSS2</i>  | NM_005656.2 | 1539–1563 | TMPRSS2-f      | CAGGAGTGTACGGGAATGTGATGGT      |
| Expression qPCR | <i>TMPRSS2</i>  | NM_005656.2 | 1608–1585 | TMPRSS2-r      | GATTAGCCGCTGCCCTCATTGTT        |

**Table W2.** (continued)

| Assay    | Gene            | Location (to TSS) | Predicted ETS Site | Primer          | Sequence                |
|----------|-----------------|-------------------|--------------------|-----------------|-------------------------|
| ChIP PCR | <i>PLAU</i>     | -1458             | -1410 & 135        | PLAU_pF2        | ATTTGCAAGGCAGGAAAATG    |
| ChIP PCR | <i>PLAU</i>     | -1282             |                    | PLAU_pR2        | GTGATTCTGTCACCCCATC     |
| ChIP PCR | <i>PLAT</i>     | -217              | -57                | PLAT_pF1        | TGTCATCACAGGGTCCCTGAA   |
| ChIP PCR | <i>PLAT</i>     | -27               |                    | PLAT_pR1        | TAAAGCAGGGGGAGGAAGTT    |
| ChIP PCR | <i>MMP3</i>     | -227              | -223               | MMP3_pF1        | CCCTACCAAGACAGGAAGCA    |
| ChIP PCR | <i>MMP3</i>     | -93               |                    | MMP3_pF1        | GCAGGACCATTTCCAAACAT    |
| ChIP PCR | <i>PLA1A</i>    | -287              | -246               | PLA1A_pF1       | TATCACGGGAAGTGGGAGAG    |
| ChIP PCR | <i>PLA1A</i>    | -143              |                    | PLA1A_pR1       | TGCCAGAGTTTTTCGGTTTCT   |
| ChIP PCR | <i>LAMC2</i>    | -561              | -535               | LAMC2_pF1       | CCCTGGTGAGCAGGAAGTTA    |
| ChIP PCR | <i>LAMC2</i>    | -474              |                    | LAMC2_pR1       | CACCCTCCAGTTTAGGGTCA    |
| ChIP PCR | <i>KCNS3</i>    | -1325             | -1144              | KCNS3_pF1       | TAGCCTCTCCTCTGGACCAA    |
| ChIP PCR | <i>KCNS3</i>    | -1083             |                    | KCNS3_pR1       | GCAGATTC AAGCTCCAGACC   |
| ChIP PCR | <i>ARHGDIB</i>  | -1692             | -1733              | ARHGDIB_pF1     | TGCTCTCATCCCCAATA       |
| ChIP PCR | <i>ARHGDIB</i>  | -1604             |                    | ARHGDIB_pR1     | CACCCTTCCCAGAAAAATC     |
| ChIP PCR | <i>KIAA0079</i> | Within exon 23    | NA                 | KIAA0079_Exon23 | TCTGTTCATGTCCTGCTGATGGA |
| ChIP PCR | <i>KIAA0079</i> | Within exon 23    |                    | KIAA0079_Exon23 | GCCCAAGAAGGACTGACCACCTT |

Oligonucleotide primers for all assays described in the Materials and Methods section are listed. The assayed gene expression qPCR for all primers is indicated, along with the bases from the corresponding GenBank sequence. All primers are listed 5' to 3'. For primers for ChIP PCR, the gene, primer location (in relation to the transcriptional start site (TSS)), and the location of predicted ETS binding sites (in relation to the TSS) are given.

**Table W3.** Cancer Types and Normal Tissues from the expO and Shyamsundar Normal Tissue Datasets.

| International Genomics Consortium's expO Data Set (GSE2109) (Bittner_Multi-cancer at www.oncomine.org) |                                          |          | Shyamsundar Normal Tissue Data Set (GSE2193) (Shyamsundar_Normal at www.oncomine.org) |                    |          |
|--------------------------------------------------------------------------------------------------------|------------------------------------------|----------|---------------------------------------------------------------------------------------|--------------------|----------|
| No.                                                                                                    | Cancer Type                              | <i>n</i> | No.                                                                                   | Normal Tissue Type | <i>n</i> |
| 1                                                                                                      | Bladder papillary carcinoma              | 4        | 1                                                                                     | Adrenal            | 4        |
| 2                                                                                                      | Bladder transitional cell carcinoma      | 10       | 2                                                                                     | Bladder            | 2        |
| 3                                                                                                      | Breast ductal carcinoma                  | 95       | 3                                                                                     | Brain              | 8        |
| 4                                                                                                      | Cervix squamous cell carcinoma           | 10       | 4                                                                                     | Buffyccoat         | 2        |
| 5                                                                                                      | Colon adenocarcinoma                     | 104      | 5                                                                                     | Cervix             | 3        |
| 6                                                                                                      | Metastatic colon carcinoma               | 16       | 6                                                                                     | Colon              | 3        |
| 7                                                                                                      | Mucinous colon carcinoma                 | 12       | 7                                                                                     | Esophagus          | 3        |
| 8                                                                                                      | Endometrial adenocarcinoma               | 5        | 8                                                                                     | Fallopian tube     | 4        |
| 9                                                                                                      | Endometrial endometrioid carcinoma       | 45       | 9                                                                                     | Heart              | 6        |
| 10                                                                                                     | Endometrial mixed mullerian tumor        | 6        | 10                                                                                    | Kidney             | 5        |
| 11                                                                                                     | Metastatic endometrial carcinoma         | 7        | 11                                                                                    | Liver              | 5        |
| 12                                                                                                     | Soft tissue sarcoma                      | 13       | 12                                                                                    | Lung               | 4        |
| 13                                                                                                     | Clear cell renal carcinoma               | 78       | 13                                                                                    | Lymph node         | 5        |
| 14                                                                                                     | Papillary renal cell carcinoma           | 6        | 14                                                                                    | Muscle             | 2        |
| 15                                                                                                     | Lung adenocarcinoma                      | 19       | 15                                                                                    | Ovary              | 5        |
| 16                                                                                                     | Bronchioloalveolar carcinoma             | 7        | 16                                                                                    | Pancreas           | 2        |
| 17                                                                                                     | Squamous cell lung carcinoma             | 17       | 17                                                                                    | Parathyroid        | 3        |
| 18                                                                                                     | Ovarian adenocarcinoma                   | 20       | 18                                                                                    | Salivary Gland     | 4        |
| 19                                                                                                     | Ovarian endometrioid carcinoma           | 13       | 19                                                                                    | Seminal Vesicle    | 3        |
| 20                                                                                                     | Metastatic ovarian carcinoma             | 36       | 20                                                                                    | Small Bowel        | 3        |
| 21                                                                                                     | Ovarian mucinous carcinoma               | 4        | 21                                                                                    | Spleen             | 3        |
| 22                                                                                                     | Ovarian papillary carcinoma              | 38       | 22                                                                                    | Stomach            | 4        |
| 23                                                                                                     | Pancreatic ductal carcinoma              | 3        | 23                                                                                    | Testes             | 3        |
| 24                                                                                                     | Rectosigmoid adenocarcinoma              | 15       | 24                                                                                    | Thymus             | 2        |
| 25                                                                                                     | Rectal adenocarcinoma                    | 13       | 25                                                                                    | Thyroid            | 6        |
| 26                                                                                                     | Renal pelvis transitional cell carcinoma | 4        | 26                                                                                    | Tonsil             | 4        |
| 27                                                                                                     | Metastatic melanoma                      | 5        | 27                                                                                    | Uterus             | 5        |
| 28                                                                                                     | Papillary thyroid carcinoma              | 10       |                                                                                       | Prostate           | 5        |
|                                                                                                        | Prostate adenocarcinoma                  | 15       |                                                                                       |                    |          |

For the expO multicancer data set accessed in the Oncomine database, the 29 cancer types displayed in Figure W7 are indicated with the number of profiled samples per type. For the Shyamsundar normal tissue data set, the 28 normal tissue types displayed in Figure W7 are indicated.

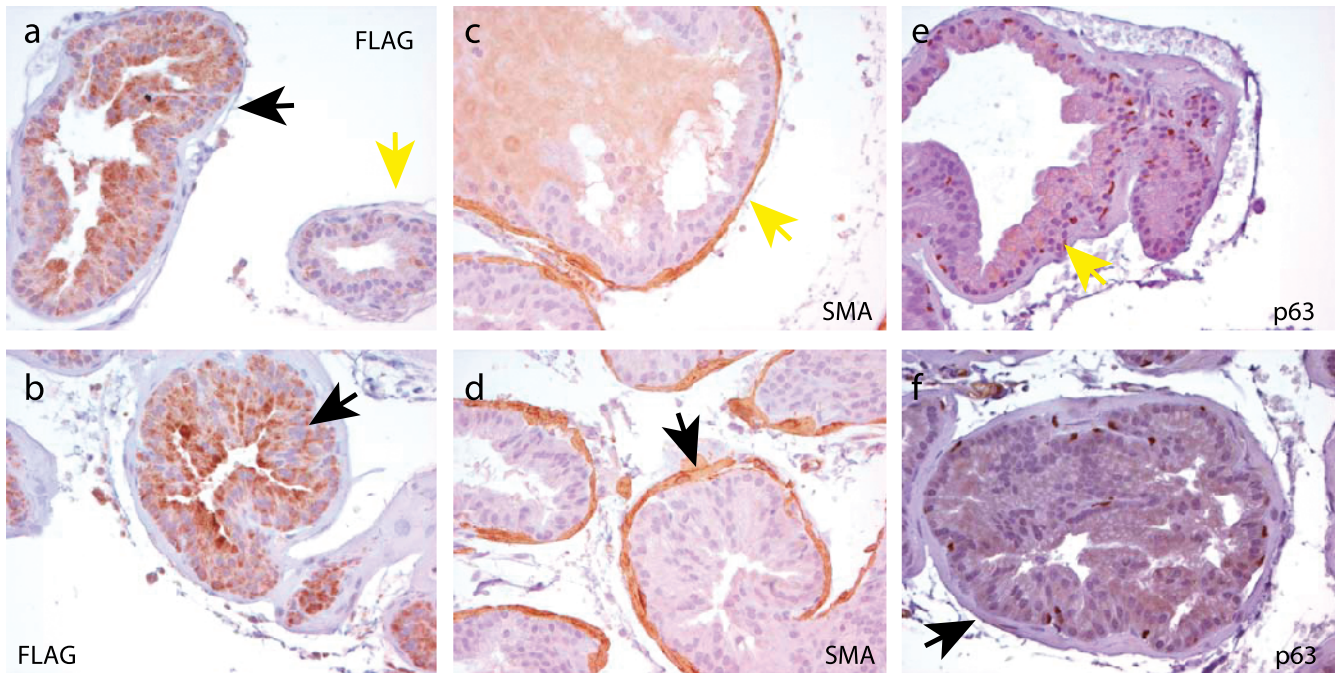

**Figure W1.** Development of mPIN in *TMPRSS2-ERG* transgenic mice. (a and b) Immunohistochemistry confirmed ERG-FLAG expression exclusively in areas of mPIN and not benign glands in *ARR2Pb-ERG* mice. Benign epithelia and areas of mPIN are indicated by yellow and black arrows, respectively. (c and d) Immunohistochemistry with smooth muscle actin (SMA) demonstrates a continuous fibromuscular layer around (c) benign glands and (d) all mPIN lesions, whereas the basal cell markers (e and f) p63 demonstrate loss of circumferential basal cells in mPIN foci (f) compared to normal glands (e). Original magnification,  $\times 400$ .

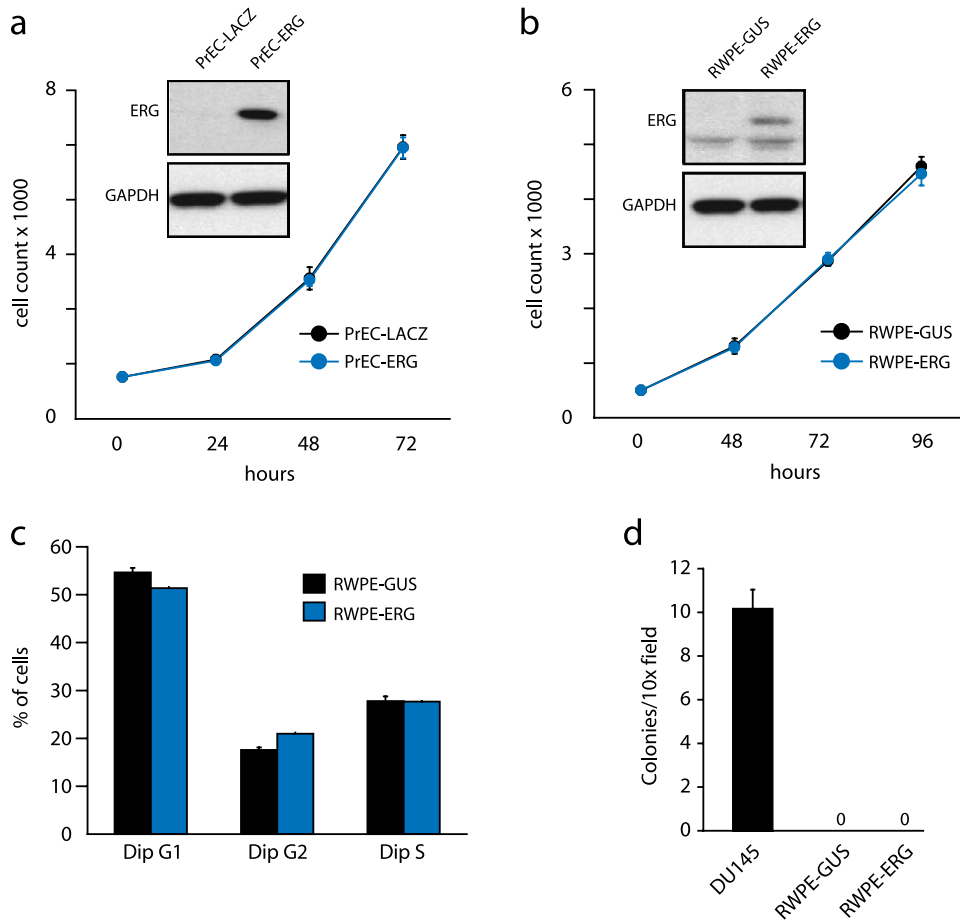

**Figure W2.** Over-expression of *ERG* does not affect proliferation or transform benign prostatic epithelial cells. (a) Primary prostatic epithelial cells (PrEC) were infected with *ERG* or *LACZ* adenovirus as indicated and assayed for proliferation. Mean ( $n = 3$ )  $\pm$  SEM are shown. Results are representative of three independent experiments. (b) The benign immortalized prostate cell line RWPE was infected with *ERG* or control (*GUS*) lentivirus as indicated, and stable clones were generated and assayed for proliferation. Insets of a and b show *ERG* over-expression by immunoblot analysis. (c) *ERG* over-expression does not increase the percentage of RWPE cells in S phase. RWPE-*GUS* and RWPE-*ERG* cells were analyzed for cell cycle distribution by fluorescence activated cell sorting (FACS). The distributions of cells in the  $G_1$ , S, and  $G_2$  phases are indicated. Mean ( $n = 4$ )  $\pm$  SEM are shown. (d) *ERG* over-expression does not enhance the anchorage independent growth of RWPE cells. RWPE-*GUS*, RWPE-*ERG*, and DU145 (positive control) cells were assessed for anchorage-independent growth by assaying colony formation in soft agar. After 12 days, the plates were stained, and colonies counted. The number of colonies per high-power field was assessed. Mean colonies per field ( $n = 6$ )  $\pm$  SEM are shown.

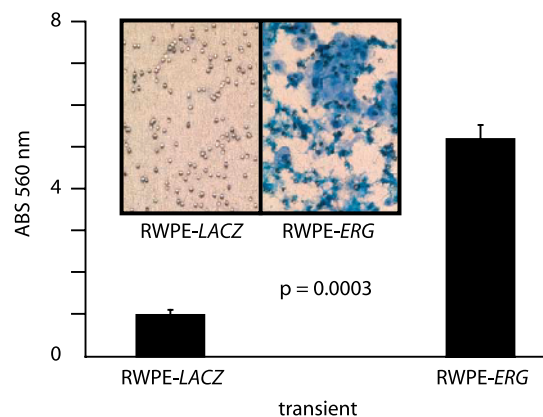

**Figure W3.** Transient over-expression of *ERG* increases invasion in RWPE cells. We infected the benign immortalized prostate cell line RWPE with *ERG* or *LACZ* adenovirus and assayed for invasion through a modified basement membrane, mean ( $n = 3$ )  $\pm$  SEM. Inset shows photomicrograph of invaded cells.

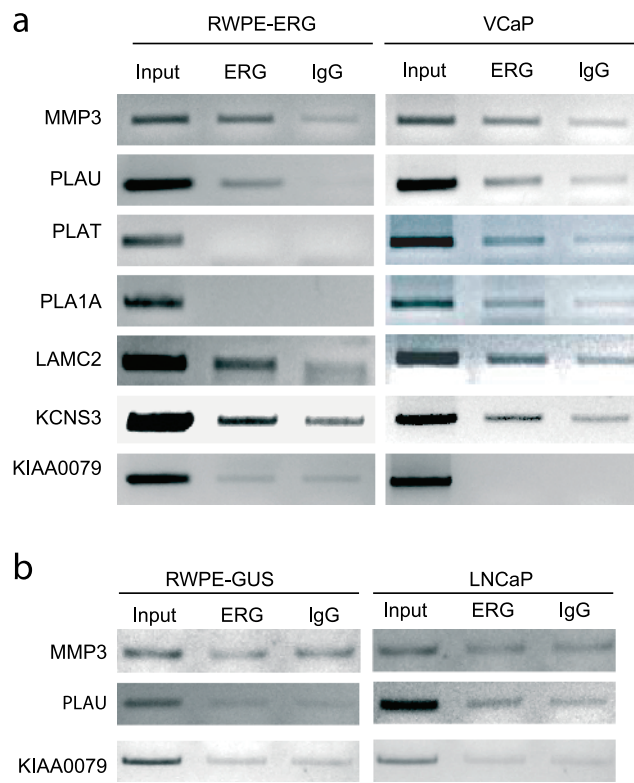

**Figure W4.** Chromatin immunoprecipitation across *TMPRSS2-ERG* model systems. (a) Chromatin immunoprecipitation to detect enrichment of ERG binding to the proximal promoters of indicated genes compared to IgG control in RWPE-ERG and VCaP cells. The promoter of KIAA0089 was used as a negative control. (b) RWPE-GUS and LNCaP failed to show any enrichment of ERG binding to assayed promoters.

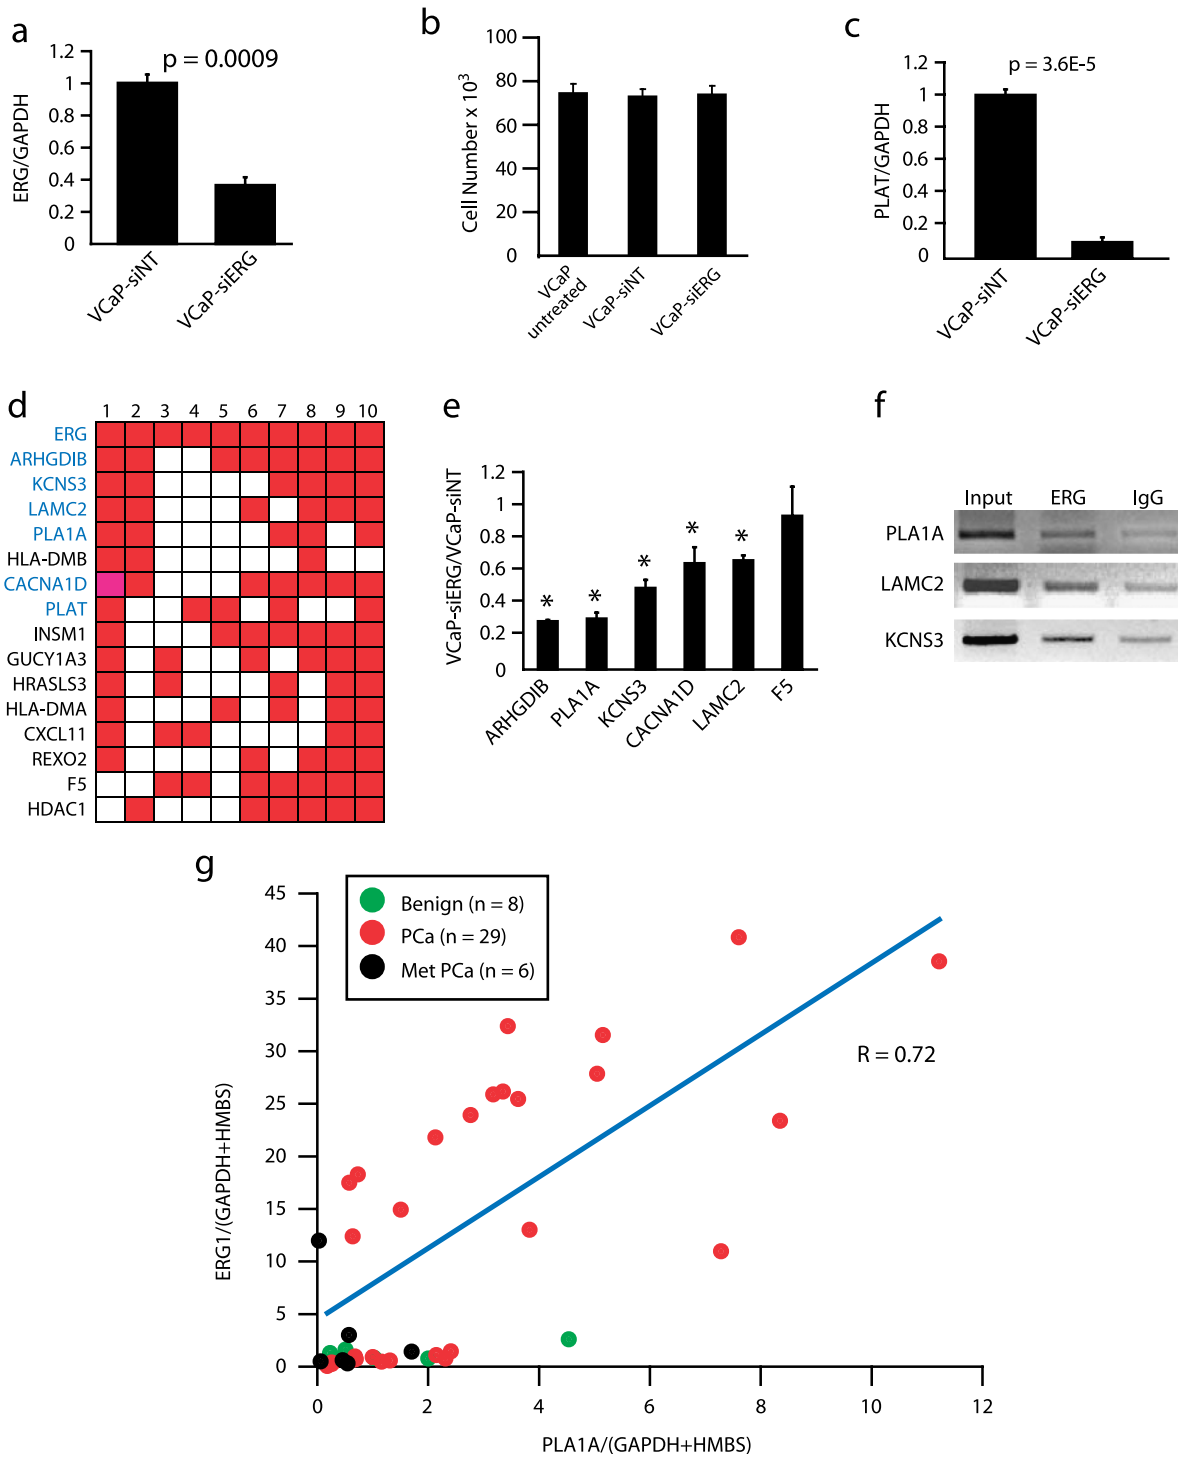

**Figure W5.** *ERG* knockdown in VCaP attenuates a transcriptional program over-expressed in *TMPRSS2:ETS*-positive tumors. (a) siRNA knockdown of *ERG* in the *TMPRSS2-ERG*-positive prostate cancer cell line VCaP. VCaP cells were either treated with transfection reagent alone (untreated) or transfected with nontargeting or *ERG* siRNA (VCaP-siERG) as indicated. *ERG* knockdown was confirmed by qPCR. (b) *ERG* knockdown in VCaP does not affect cell proliferation. VCaP cells as indicated were assayed for proliferation by cell counting 72 hours after siRNA transfection. Mean ( $n = 3$ )  $\pm$  SEM are shown. (c) qPCR confirmation of decreased *PLAT* expression in VCaP-siERG compared to VCaP-siNT cells. (d) Overlay map identifying genes present (red cells) across multiple concepts in the VCaP-siERG enrichment network (indicated by number). *CACNA1D*, in magenta, was identified as differentially expressed in three of four replicate VCaP-siERG arrays. Genes confirmed as under-expressed in VCaP-siERG cells by qPCR are indicated in blue. (e) qPCR confirmation of downregulated genes in VCaP-siERG cells;  $*P < .05$ , compared to VCaP treated with nontargeting siRNA. (f) Chromatin immunoprecipitation identification of direct *ERG* targets. (g) *ERG* and *PLA1A* show correlated expression across prostate tissues. *ERG* and *PLA1A* expression (normalized to *GAPDH*) was determined by qPCR in benign prostate (green), localized prostate cancer (PCa, red), and metastatic prostate cancer (Met PCa, black) tissue samples. The trend line is shown in blue.

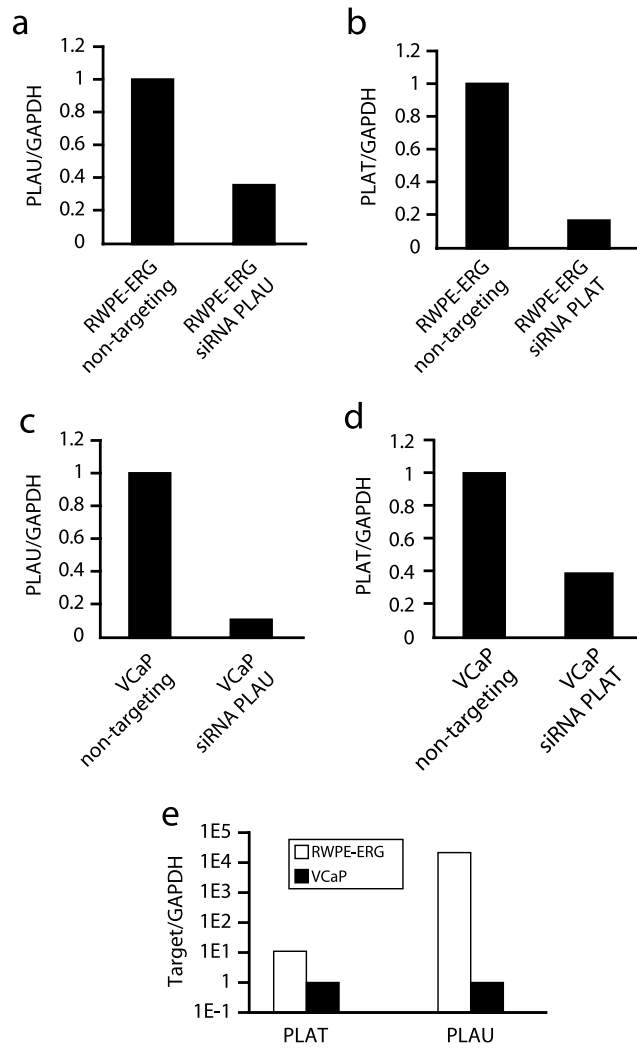

**Figure W6.** qPCR confirmation of *PLAU* and *PLAT* knockdown in RWPE-ERG and VCaP cells. (a and b) RWPE-ERG cells were treated with non-targeting siRNA or siRNA against (a) *PLAU* or (b) *PLAT*, and knockdown was confirmed by qPCR. (c and d) VCaP cells were treated with nontargeting siRNA or siRNA against (c) *PLAU* or (d) *PLAT*, and knockdown was confirmed by qPCR. (e) The relative amount of *PLAT* and *PLAU* in RWPE-ERG (white) compared to VCaP (black) was determined by qPCR.

GSE 8218 (Yang et al.)

| R Rank | GENE    | Feature ID  | R    |
|--------|---------|-------------|------|
| 1      | ERG     | 211626_x_at | 0.89 |
| 2      | ERG     | 213541_s_at | 0.89 |
| 3      | ERG     | 222079_at   | 0.89 |
| 4      | PLA1A   | 219584_at   | 0.75 |
| 5      | PLA2G7  | 206214_at   | 0.66 |
| 6      | EST     | 221018_s_at | 0.64 |
| 7      | COL2A1  | 213492_at   | 0.60 |
| 8      | COL2A1  | 217404_s_at | 0.60 |
| 9      | PEX10   | 206351_s_at | 0.57 |
| 10     | EST     | 219695_at   | 0.57 |
| 11     | FAM77C  | 219438_at   | 0.57 |
| 12     | PEX10   | 206352_s_at | 0.57 |
| 13     | CACNA1D | 210108_at   | 0.57 |
| 14     | OGDHL   | 219277_s_at | 0.57 |
| 15     | CACNA1D | 207998_s_at | 0.57 |
| 16     | CRISP3  | 207802_at   | 0.54 |
| 17     | LAMC2   | 202267_at   | 0.53 |
| 18     | KCNS3   | 205968_at   | 0.53 |
| 19     | FOXD1   | 206307_s_at | 0.51 |
| 20     | DLX2    | 207147_at   | 0.51 |
| 21     | TNRC9   | 215108_x_at | 0.51 |
| 22     | NETO2   | 218888_s_at | 0.51 |
| 23     | TNRC9   | 216623_x_at | 0.51 |
| 24     | TNRC9   | 214774_x_at | 0.51 |
| 25     | INSM1   | 206502_s_at | 0.51 |

Glinsky et al.

| R Rank | GENE    | Feature ID  | R    |
|--------|---------|-------------|------|
| 1      | ERG     | 211626_x_at | 0.91 |
| 2      | ERG     | 222079_at   | 0.91 |
| 3      | ERG     | 213541_s_at | 0.90 |
| 4      | KCNS3   | 205968_at   | 0.76 |
| 5      | CACNA1D | 207998_s_at | 0.74 |
| 6      | PDE3B   | 222317_at   | 0.74 |
| 7      | EST     | 214582_at   | 0.74 |
| 8      | CACNA1D | 210108_at   | 0.74 |
| 9      | EST     | 214596_at   | 0.69 |
| 10     | MAGED4  | 221261_x_at | 0.68 |
| 11     | ITPR3   | 201188_s_at | 0.67 |
| 12     | ITPR3   | 201189_s_at | 0.67 |
| 13     | LAMC2   | 202267_at   | 0.64 |
| 14     | HDAC1   | 201209_at   | 0.61 |
| 15     | AMPD3   | 207992_s_at | 0.61 |
| 16     | NCALD   | 211685_s_at | 0.61 |
| 17     | ARHGDI3 | 201288_at   | 0.57 |
| 18     | ANKRD6  | 204671_s_at | 0.57 |
| 19     | ANKRD6  | 204672_s_at | 0.57 |
| 20     | HLA-DMB | 203932_at   | 0.53 |
| 21     | PLA1A   | 219584_at   | 0.53 |

Lapointe et al.

| R Rank | GENE      | Feature ID    | R    |
|--------|-----------|---------------|------|
| 1      | ERG       | IMAGE:123755  | 0.71 |
| 2      | CACNA1D   | IMAGE:49630   | 0.71 |
| 3      | EST       | IMAGE:1709503 | 0.68 |
| 4      | NPR3      | IMAGE:1762111 | 0.68 |
| 5      | MYO6      | IMAGE:470216  | 0.64 |
| 6      | MYO6      | IMAGE:744944  | 0.64 |
| 7      | CACNA1D   | IMAGE:757337  | 0.64 |
| 8      | GPR110    | IMAGE:1492202 | 0.62 |
| 9      | PLA1A     | IMAGE:250673  | 0.62 |
| 10     | MEG3      | IMAGE:206907  | 0.62 |
| 11     | SH3RF1    | IMAGE:1573665 | 0.51 |
| 12     | EST       | IMAGE:1926387 | 0.51 |
| 13     | JOSD3     | IMAGE:193122  | 0.51 |
| 14     | SH3RF1    | IMAGE:811101  | 0.51 |
| 15     | C20orf199 | IMAGE:796309  | 0.51 |
| 16     | C20orf199 | IMAGE:745296  | 0.51 |
| 17     | CBR4      | IMAGE:454795  | 0.51 |
| 18     | CBR4      | IMAGE:359713  | 0.51 |

Tomlins et al.

| R Rank | GENE  | Feature ID   | R    |
|--------|-------|--------------|------|
| 1      | ERG   | IMAGE:123755 | 0.57 |
| 2      | PLA1A | IMAGE:250673 | 0.57 |

Vanaja et al.

| R Rank | GENE  | Feature ID  | R    |
|--------|-------|-------------|------|
| 1      | ERG   | 213541_s_at | 0.58 |
| 2      | KCTD6 | 238077_at   | 0.58 |

**Figure W7.** Identification of genes showing coexpression with *ERG* across multiple prostate cancer profiling studies. Genes showing coexpression with *ERG* ( $R > 0.5$ ) from prostate cancer profiling studies in the OncoPrint database. *ERG* was queried in the OncoPrint database using the coexpression module. For each study, all genes showing  $R > 0.5$  are listed, along with the corresponding feature identification. *ERG* is indicated in red. Genes showing  $R > 0.5$  in multiple studies are indicated in blue.



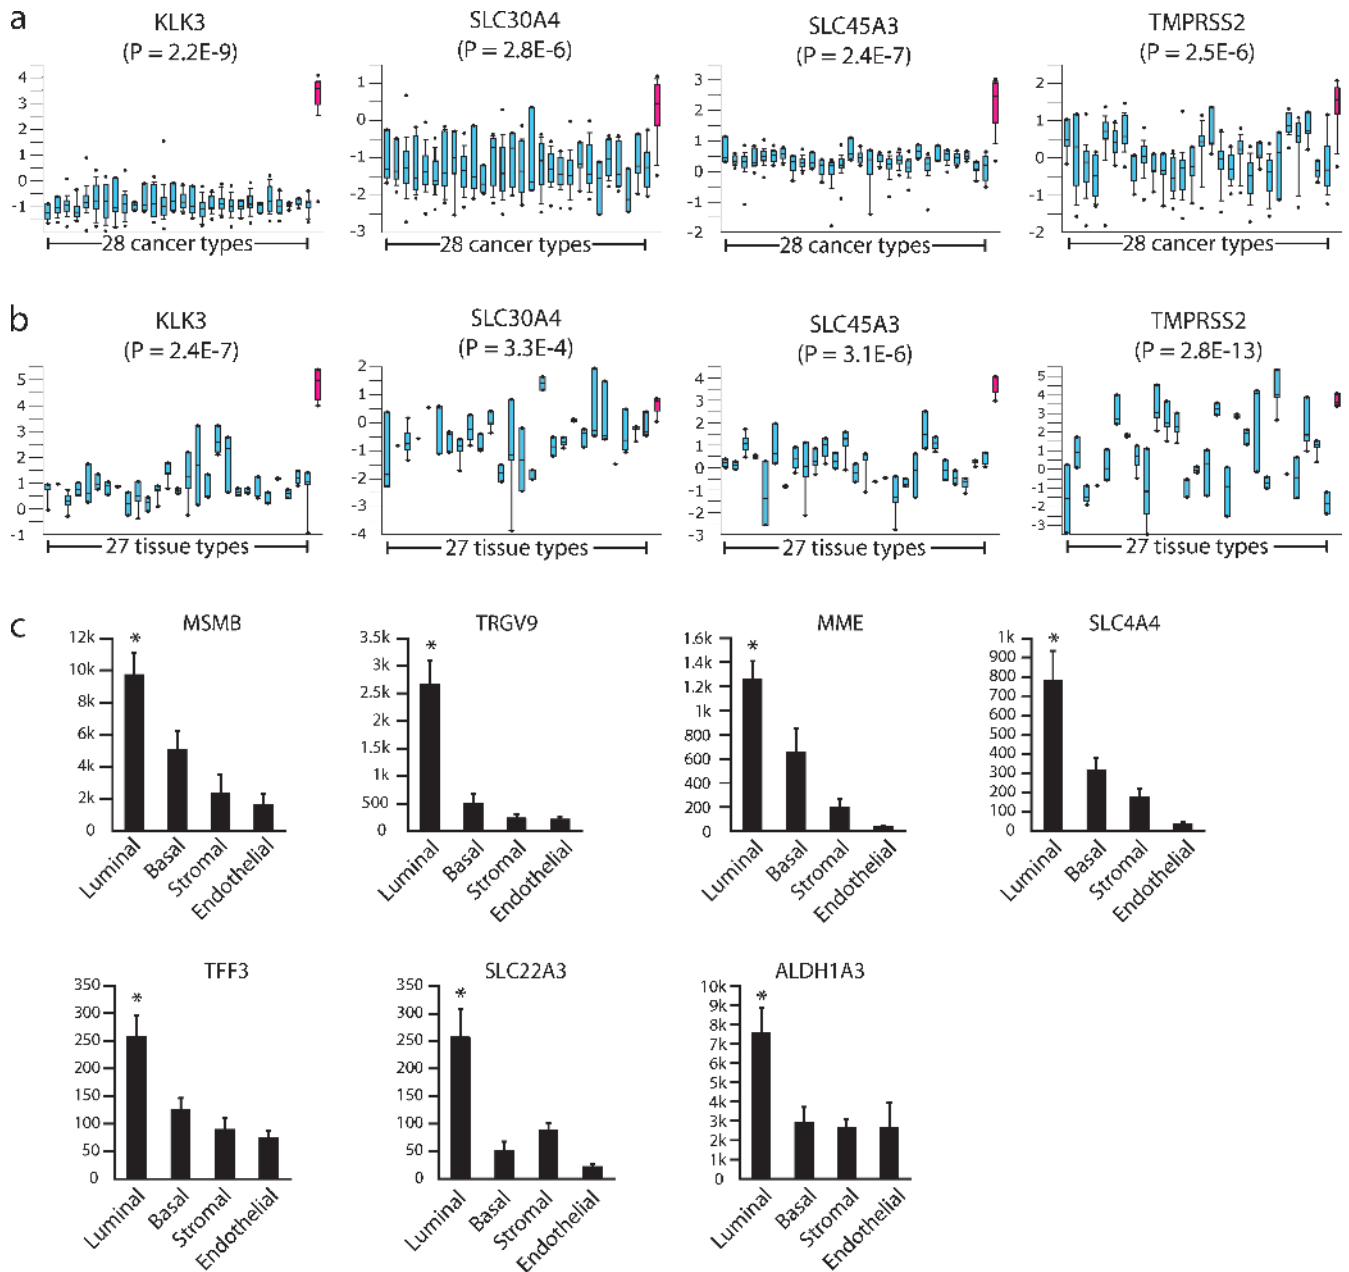

**Figure W8.** Prostate epithelial specificity of genes induced in VCaP on ERG knockdown. (a) Genes confirmed by qPCR to be over-expressed in VCaP cells treated with *ERG* siRNA were interrogated in the expO multicancer data set, containing expression profiles from 28 cancer types (blue) and prostate cancer (magenta). The significance of prostate cancer *versus* all other cancer types is indicated. (b) The same genes were also interrogated in the Shyamsundar et al. [29] normal tissue data set, containing expression profiles from 27 normal tissue types (blue) and normal prostate tissue (magenta). For both a and b, box and whisker plots show the median and 10th and 90th percentiles in normalized expression units (z scores). All cancer and normal tissue types are defined in Table W3. (c) Analysis of prostate cell type specificity using a microarray data set profiling magnetically sorted prostate cell populations for additional genes identified as over-expressed in VCaP cells on *ERG* knockdown (see Figure 4b). Mean RMA-normalized fluorescent intensities ( $n = 5 \pm$  SEM) are shown.  $*P < .05$ , for all pairwise *t* tests involving luminal cells.
